# Supplementary material for: Combinatorial cell–3D biomaterials cytocompatibility screening for tissue engineering using bioinspired superhydrophobic substrates
Source: Royal Society of Chemistry journal article supplement (doi:10.1039/c2ib00170e), 2012-01-01
Supplement: c2ib00170e.pdf [file c2ib00170e.pdf]

Supplementary information (ESI) for Integrative Biology

Combinatorial cell-3D biomaterials cytocompatibility screening for tissue engineering using bioinspired superhydrophobic substrates

Christiane L. Salgado,<sup>a,b,‡</sup> Mariana B. Oliveira<sup>a,b,‡</sup> and João F. Mano<sup>a,b,\*</sup>

<sup>a</sup>3B's Research Group – Biomaterials, Biodegradables and Biomimetics, University of Minho, Headquarters of the European Institute of Excellence on Tissue Engineering and Regenerative Medicine, AvePark, 4806-909 Taipas, Guimarães, Portugal.

<sup>b</sup>ICVS/3B's - PT Government Associate Laboratory, Braga/Guimarães, Portugal.

\*Corresponding author email: jmano@dep.uminho.pt

‡C.L.S. and M.B.O. contributed equally to this work.

The numerical values obtained from image-based pixel quantification and dsDNA quantification in the hydrogels for L929 cells and MC3T3-E1 cells can be observed in Figure S1 and Figure S2, respectively. The plots evidence the corresponding tendencies for image-based analysis and conventional analysis of the cell number in the hydrogels produced in the array-based platform.

Figure S1:

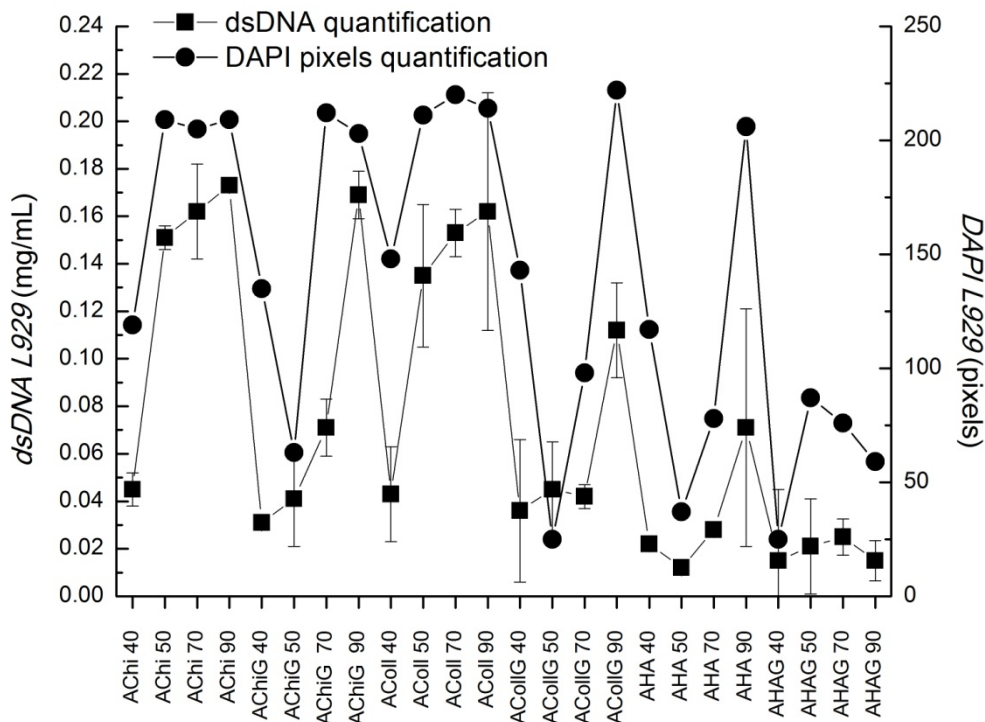

Figure S1 – Data for the dsDNA and DAPI quantifications for the L929 cell line in the array-based hydrogels

Figure S2:

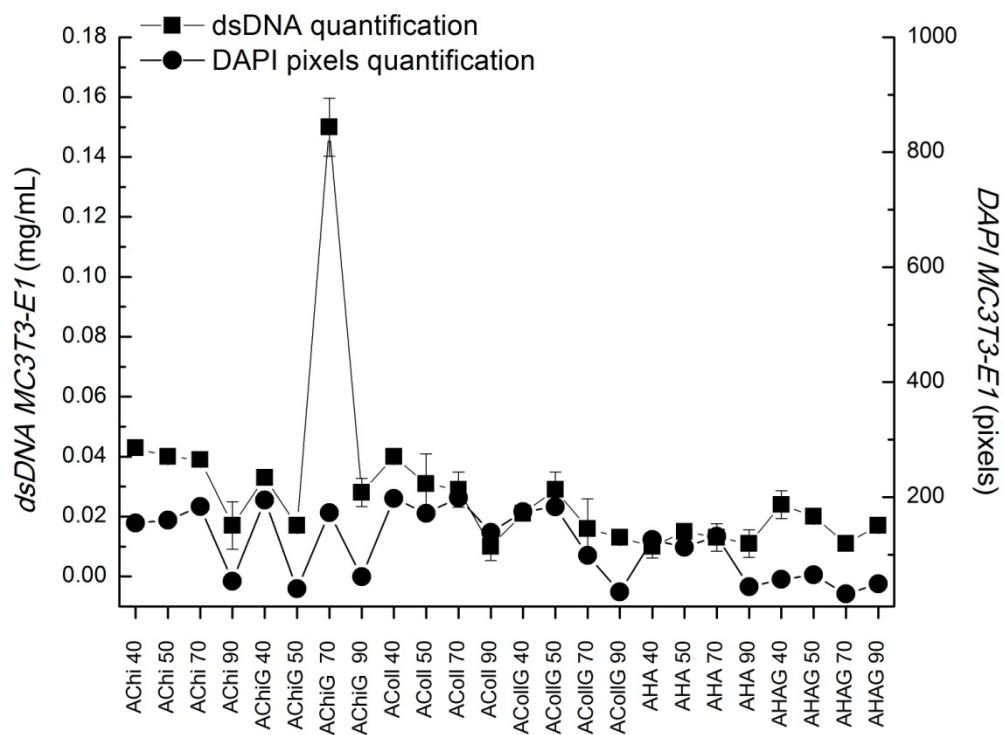

Figure S2- Data for the dsDNA and DAPI quantifications for the MC3T3-E1 cell line in the array-based hydrogels.
